# Supplementary material for: Sitagliptin Improves the Impaired Acute Insulin Response during a Meal Tolerance Test in Japanese Patients with Type 2 Diabetes Mellitus: A Small-Scale Real-World Study
Source: PubMed Central journal article supplement — Diabetes Ther. 2014 Jun 3;5(1):285–97. doi: 10.1007/s13300-014-0071-1 (PMC4065288; doi:10.1007/s13300-014-0071-1), 2014-06-03
Supplement: 13300_2014_71_MOESM1_ESM.pdf [file 13300_2014_71_MOESM1_ESM.pdf]

- The authors evaluated the effects of sitagliptin on the acute insulin responses in Japanese patients with type 2 diabetes mellitus (T2DM) using meal tolerance tests.
- Twenty-one patients with T2DM were given a test meal (460 kcal), and plasma glucose and insulin were measured at 0 min (fasting), and 30, 60, 120, and 180 min after the meal. The insulinogenic index of all of these patients was below 43.2.
- The postprandial profiles were assessed at baseline and after 3 months of treatment with 50 mg/day sitagliptin after a meal (n = 11) or were untreated (control group; n = 10).
- Sitagliptin significantly decreased the plasma glucose levels at 60, 120, and 180 min and significantly increased the plasma insulin levels at 0 and 30 min. The insulinogenic index increased significantly in the sitagliptin group compared with the control group (+16.7 vs. +0.1,  $P < 0.005$ ).
- Administration of sitagliptin at 50 mg/day after a meal improved the impaired acute insulin response and suppressed postprandial hyperglycemia.

This summary slide represents the opinions of the authors. This study was supported by a Tottori University Hospital Research Grant. We thank Ms. Maki Kameda and Ms. Yoshiko Oda for their technical assistance. For a full list of acknowledgments and conflicts of interest for all authors of this article, please see the full text online. Copyright © The Author(s) 2014. Creative Commons Attribution Noncommercial License (CC BY-NC).
